# Supplementary material for: Effects of Paramylon Extracted from Euglena gracilis EOD-1 on Parameters Related to Metabolic Syndrome in Diet-Induced Obese Mice
Source: PubMed Central journal article supplement (PMC6682983; doi:10.3390/nu11071674), 2019-07-21
Supplement: nutrients-11-01674-s001.pdf [file nutrients-11-01674-s001.pdf]

(A)

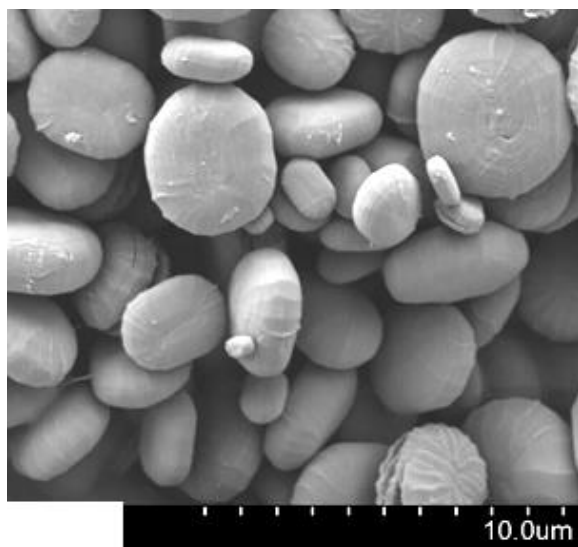

(B)

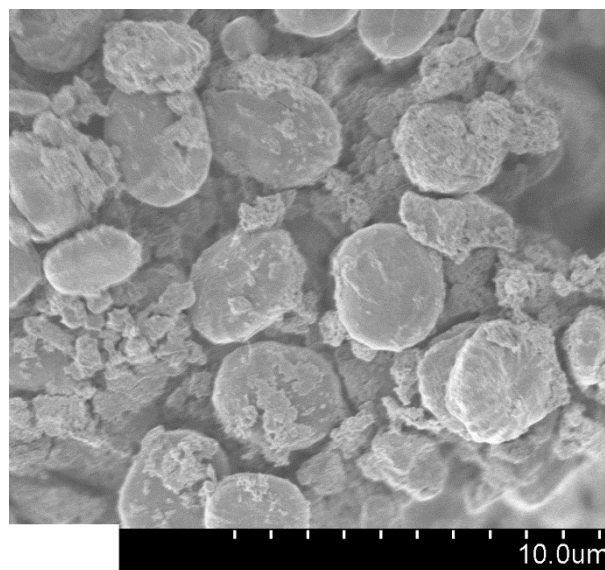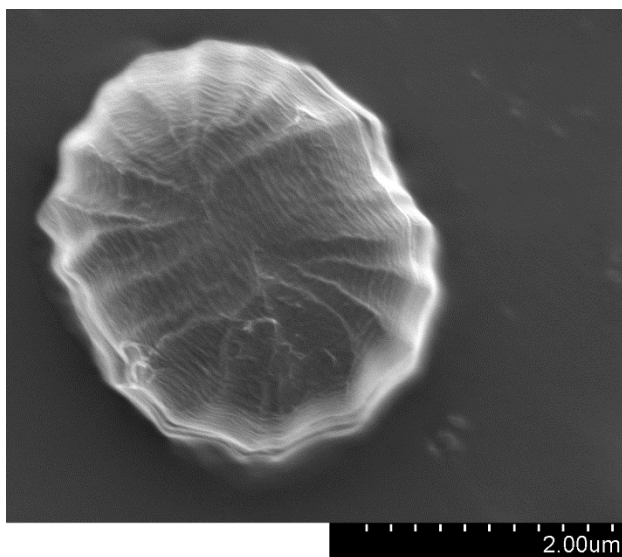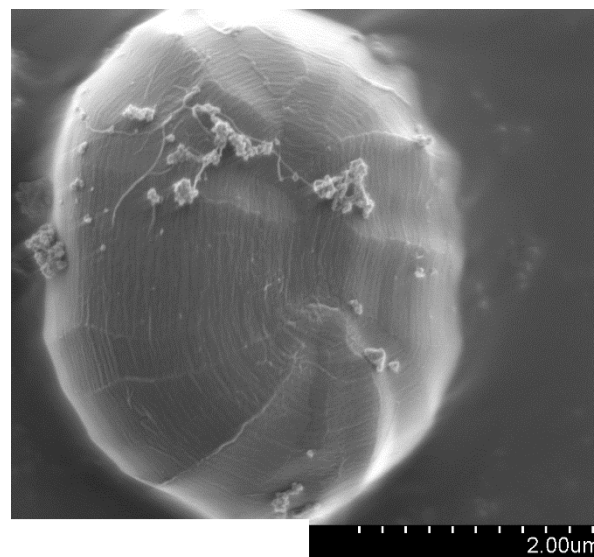

Supplementary Figure S1 Intact PM (A) and PM recovered from feces (B) by scanning electron microscopy.
